# Supplementary material
Source: PubMed Central journal article supplement (PMC5035700)
Supplement: NIHMS803685-supplement-Supporting_Information.pdf [file NIHMS803685-supplement-Supporting_Information.pdf]

# **Supporting Information**

## **NMR/MS Translator for the Enhanced Simultaneous Analysis of Metabolomics Mixtures by NMR Spectroscopy and Mass Spectrometry: Application to Human Urine**

Kerem Bingol<sup>1\*</sup> and Rafael Brüscheiler<sup>1,2\*</sup>

<sup>1</sup>Department of Chemistry and Biochemistry, The Ohio State University, Columbus,  
Ohio 43210, United States

<sup>2</sup>Campus Chemical Instrument Center, The Ohio State University, Columbus, Ohio  
43210, United States

\*To whom correspondence should be addressed:

Kerem Bingol, Ph.D., E-mail: [bingol.1@osu.edu](mailto:bingol.1@osu.edu)

Rafael Brüscheiler, Ph.D., E-mail: [bruschweiler.1@osu.edu](mailto:bruschweiler.1@osu.edu)

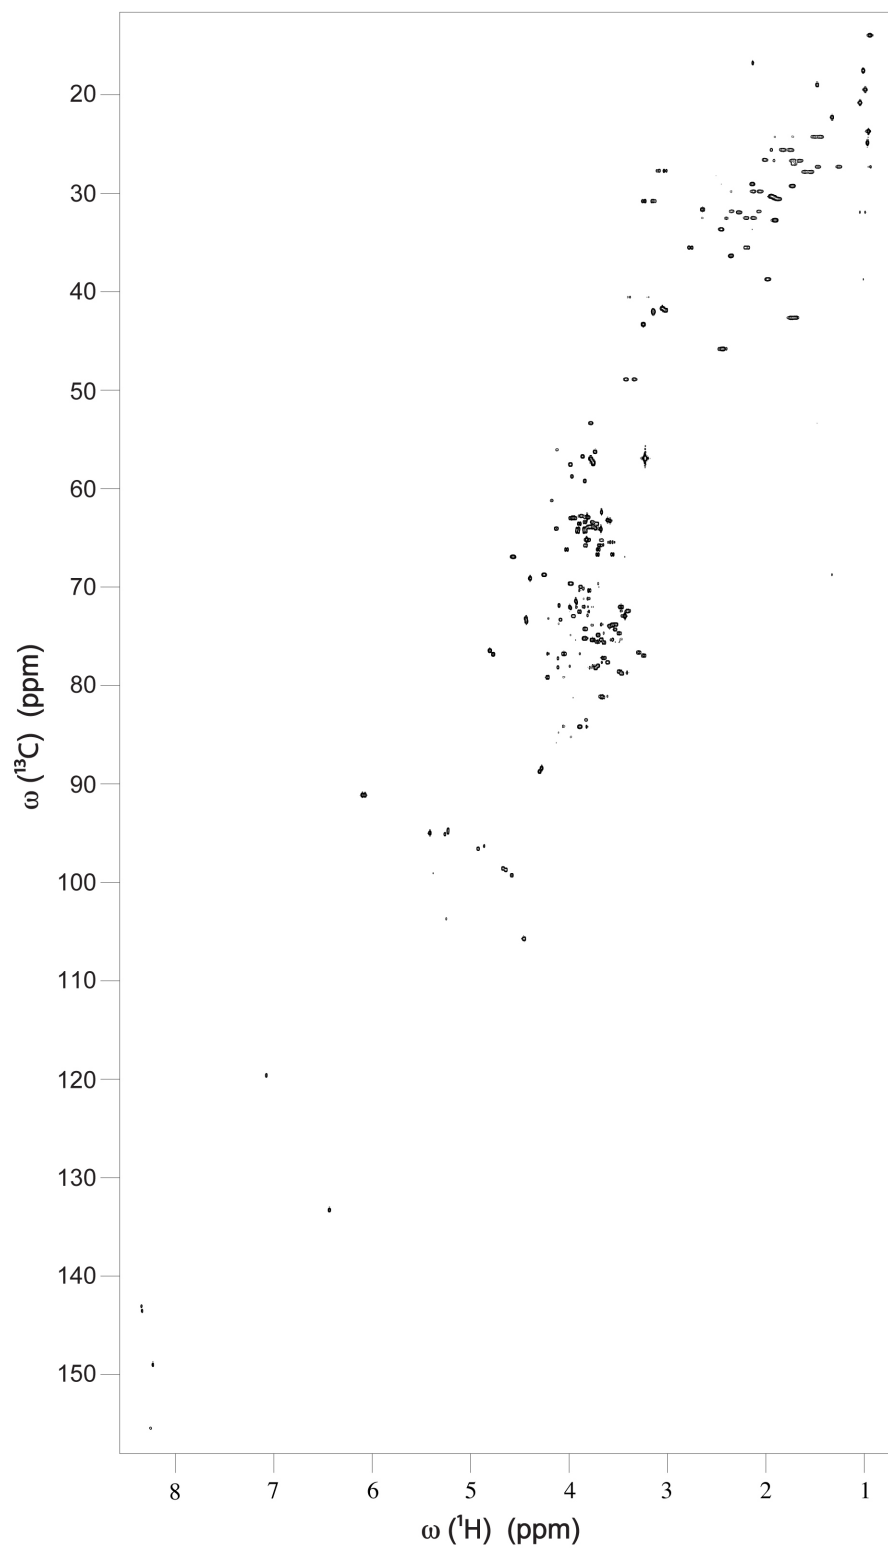

**Figure S1.** 2D  $^{13}\text{C}$ - $^1\text{H}$  HSQC spectrum of 26-compound model mixture. The spectrum was acquired at 600 MHz proton frequency at 298 K with 800 and 512 complex data points along the direct and indirect dimensions, respectively.

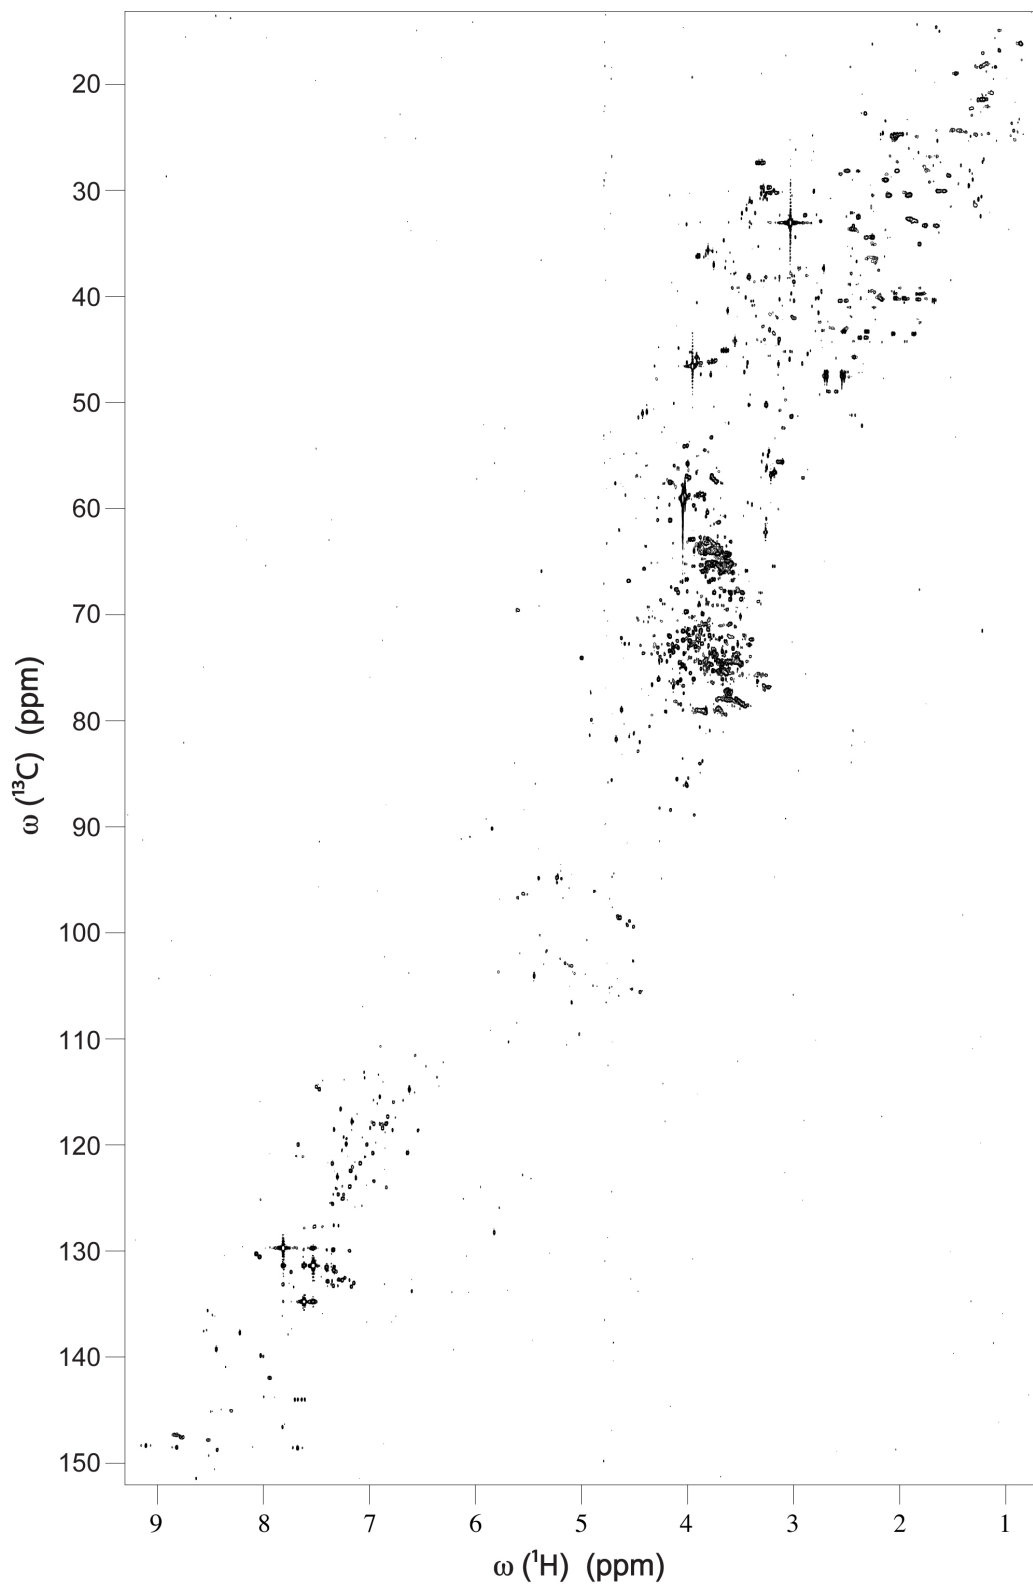

**Figure S2.** 2D  $^{13}\text{C}$ - $^1\text{H}$  HSQC spectrum of human urine collected from a pool of healthy individuals. The spectrum was acquired at 800 MHz proton frequency at 298 K with 1024 and 512 complex data points along the indirect and direct dimensions, respectively.

**Table S1.** List of identified metabolites in the model mixture by the NMR/MS Translator and their  $m/z$  ratios in the MS<sup>1</sup> spectra (positive and negative mode). The list is used to reconstruct the MS<sup>1</sup> spectrum from the 2D <sup>13</sup>C-<sup>1</sup>H HSQC spectrum in Figure 2. ACN and FA stand for acetonitrile and formic acid, respectively.

| Metabolite             | Feature                              | $m/z^a$  | ppm <sup>b</sup> | Metabolite                 | Feature                              | $m/z^a$  | ppm <sup>b</sup> |
|------------------------|--------------------------------------|----------|------------------|----------------------------|--------------------------------------|----------|------------------|
| Lysine                 | [M+H] <sup>+</sup>                   | 147.1126 | -4.78            | Alanine                    | [M+H] <sup>+</sup>                   | 90.0548  | -8.19            |
| Isoleucine/<br>Leucine | [M+H] <sup>+</sup>                   | 132.1019 | -4.06            | Ribose                     | [M+H] <sup>+</sup>                   | 151.0626 | 12.63            |
| Isoleucine/<br>Leucine | [M+Na] <sup>+</sup>                  | 154.0837 | -4.47            | Ribose                     | [M+Na] <sup>+</sup>                  | 173.0417 | -5.18            |
| Histidine              | [M+H] <sup>+</sup>                   | 156.0765 | -4.83            | Ribose                     | [M+FA-H] <sup>-</sup>                | 195.0511 | 3.18             |
| Histidine              | [M+ACN+H] <sup>+</sup>               | 197.1008 | -15.3            | Lactose/Sucrose            | [M+H] <sup>+</sup>                   | 343.1230 | -3.17            |
| Glutamine              | [M+H] <sup>+</sup>                   | 147.0763 | -4.84            | Lactose/Sucrose            | [M+Na] <sup>+</sup>                  | 365.1049 | -2.91            |
| Glutamine              | [M+Na] <sup>+</sup>                  | 169.0578 | -6.72            | Lactose/Sucrose            | [M+H-H <sub>2</sub> O] <sup>+</sup>  | 325.1127 | -2.49            |
| Glutamine              | [M-H] <sup>-</sup>                   | 145.0617 | 2.67             | Lactose/Sucrose            | [M-H] <sup>-</sup>                   | 341.1090 | 1.88             |
| Ornithine              | [M+H] <sup>+</sup>                   | 133.0989 | 8.72             | Lactose/Sucrose            | [M+Cl] <sup>-</sup>                  | 377.0856 | 1.29             |
| Ornithine              | [M+Na] <sup>+</sup>                  | 155.0791 | -3.50            | Lactose/Sucrose            | [M+FA-H] <sup>-</sup>                | 387.1145 | 1.56             |
| Ornithine              | [M+H-H <sub>2</sub> O] <sup>+</sup>  | 115.0866 | -4.69            | Fructose/Glucose/Galactose | [M+Na] <sup>+</sup>                  | 203.0524 | -3.78            |
| Ornithine              | [M-H] <sup>-</sup>                   | 131.0828 | 5.82             | Fructose/Glucose/Galactose | [M+H-2H <sub>2</sub> O] <sup>+</sup> | 145.0492 | -5.88            |
| Carnitine              | [M+H] <sup>+</sup>                   | 162.1125 | -3.33            | Fructose/Glucose/Galactose | [M+H-H <sub>2</sub> O] <sup>+</sup>  | 163.0599 | -4.64            |
| Carnitine              | [M+Na] <sup>+</sup>                  | 184.0942 | -4.39            | Fructose/Glucose/Galactose | [M-H] <sup>-</sup>                   | 179.0561 | 3.09             |
| Shikimate              | [M+H-2H <sub>2</sub> O] <sup>+</sup> | 139.0389 | -4.53            | Fructose/Glucose/Galactose | [M+Cl] <sup>-</sup>                  | 215.0328 | 2.58             |
| Shikimate              | [M-H] <sup>-</sup>                   | 173.0454 | 2.58             | Threonine                  | [M+H] <sup>+</sup>                   | 120.0654 | -5.46            |
| Arginine               | [M+H] <sup>+</sup>                   | 175.1189 | -3.32            | Threonine                  | [M+H-H <sub>2</sub> O] <sup>+</sup>  | 102.0547 | -7.42            |
| Arginine               | [M+Na] <sup>+</sup>                  | 197.1008 | -3.10            | Threonine                  | [M-H] <sup>-</sup>                   | 118.0512 | 7.01             |
| Arginine               | [M+2H] <sup>2+</sup>                 | 88.0632  | -5.63            | Proline                    | [M+H] <sup>+</sup>                   | 116.0705 | -5.66            |
| Arginine               | [M-H] <sup>-</sup>                   | 173.1043 | 2.70             | Proline                    | [M+NH <sub>4</sub> ] <sup>+</sup>    | 133.0989 | 8.72             |
| Glutamate              | [M+H] <sup>+</sup>                   | 148.0602 | -5.11            | Proline                    | [M+Na] <sup>+</sup>                  | 138.0510 | -15.46           |
| Glutamate              | [M+H-H <sub>2</sub> O] <sup>+</sup>  | 130.0497 | -5.89            | Methionine                 | [M+H] <sup>+</sup>                   | 150.0582 | -4.20            |
| Glutamate              | [M-H] <sup>-</sup>                   | 146.0459 | 3.56             | Methionine                 | [M-H] <sup>-</sup>                   | 148.0437 | 3.41             |
| Glutamate              | [M-H <sub>2</sub> O-H] <sup>-</sup>  | 128.0353 | 3.89             | Serine                     | [M+H] <sup>+</sup>                   | 106.0497 | -7.19            |
| Inosine                | [M+H] <sup>+</sup>                   | 269.0895 | 3.46             | Serine                     | [M+ACN+H] <sup>+</sup>               | 147.0763 | -4.84            |
| Inosine                | [M+Na] <sup>+</sup>                  | 291.0696 | -3.40            | Serine                     | [M+ACN+Na] <sup>+</sup>              | 169.0578 | -6.72            |
| Inosine                | [M-H] <sup>-</sup>                   | 267.0736 | 2.60             | Citrulline                 | [M+H] <sup>+</sup>                   | 176.1028 | -3.99            |
| Adenosine              | [M+H] <sup>+</sup>                   | 268.1040 | -2.23            | Citrulline                 | [M+Na] <sup>+</sup>                  | 198.0849 | -2.87            |
| Adenosine              | [M+Cl] <sup>-</sup>                  | 302.0665 | 2.83             | Citrulline                 | [M-H] <sup>-</sup>                   | 174.0883 | 2.21             |
| Adenosine              | [M+FA-H] <sup>-</sup>                | 312.0954 | 3.26             | Valine                     | [M+H] <sup>+</sup>                   | 118.0861 | -5.79            |
| Cysteine               | [M+H] <sup>+</sup>                   | 122.0268 | -6.12            |                            |                                      |          |                  |

<sup>a</sup> Experimentally detected  $m/z$  ratio of an ion.

<sup>b</sup>  $m/z$  ratio difference (in units of ppm) between experimentally detected  $m/z$  ratio and theoretical  $m/z$  ratio of a given ion.

**Table S2.** List of all identified metabolites in human urine by 2D  $^{13}\text{C}$ - $^1\text{H}$  HSQC. The letter “M” behind several metabolite names (in parentheses) are used to denote that these metabolites were identified manually, whereas the rest of the metabolites were identified automatically by querying the COLMAR  $^{13}\text{C}$ - $^1\text{H}$  HSQC database.

|                                  |                              |
|----------------------------------|------------------------------|
| Acetic acid                      | 1,2-Propanediol              |
| Acetylcarnitine                  | Quinolinic acid              |
| Alanine                          | Quinic acid                  |
| 1,6-Anhydro beta glucose         | Saccharate                   |
| Arabitol                         | Serine                       |
| N-acetylneuraminic acid          | Suberic acid                 |
| Allantoin                        | Sorbitol                     |
| Alpha-ketoglutaric acid          | Succinic acid                |
| 3-Aminoisobutyric acid           | Threitol                     |
| Ascorbate                        | Trigonelline                 |
| 4-Acetamidobutyric acid          | Trimethylamine-N-oxide       |
| Allose                           | Tyrosine                     |
| 2-Aminoadipic acid               | Tartaric acid                |
| Arabinose                        | Taurine                      |
| Arginine                         | Threonine                    |
| Asparagine                       | Uracil                       |
| Betaine                          | Valine                       |
| Carnitine                        | Xylitol                      |
| Creatinine                       | Xylose                       |
| Choline                          | Caffeine                     |
| Cystine                          | Sucrose                      |
| Citraconic acid                  | Lactose                      |
| N,N-Dimethylglycine              | Ribose                       |
| Meso-erythritol                  | Galactitol                   |
| Ethanolamine                     | N-acetylputrescine           |
| Fucose                           | 3-Hydroxyisobutyric acid     |
| Fructose                         | Dimethylamine                |
| Glucuronate                      | Indoxyl sulfate              |
| Glutamine                        | Alpha hydroxyisobutyric acid |
| Guanidineacetic acid             | 3-Hydroxyisovaleric acid     |
| Glycerol                         | Methylguanidine              |
| Glycine                          | 1,3-Dimethyluric acid        |
| Galactose                        | Dimethylsulfone              |
| Gluconic acid                    | Indole-3-acetic acid         |
| Glucose                          | Leucine                      |
| Homocitrulline                   | N-acetylaspartic acid        |
| Hippuric acid                    | Adenosine                    |
| 4-Hydroxy-3-methoxymandelic acid | Inosine                      |
| 3-Hydroxy-3-methylglutaric acid  | 1-Methylhistidine (M)        |
| 4-Hydroxyphenylacetic acid       | Glycolate (M)                |
| Homovanillic acid                | Citrate (M)                  |
| 3-Hydroxyphenylacetic acid       | Creatine (M)                 |
| Scyllo-inositol                  | Histidine (M)                |
| Isethionic acid                  | Pantothenate (M)             |
| Myo-inositol                     | Trans-aconitic acid (M)      |
| Lactic acid                      | Threo-isocitric acid (M)     |
| Lysine                           | Cis-aconitic acid (M)        |
| Mannitol                         | Phenol (M)                   |
| Pimelic acid                     | Adipic acid (M)              |

**Table S3.** List of metabolites in human urine that have at least one consistent  $m/z$  ratio in the experimental urine MS<sup>1</sup> spectra (positive and negative ion mode) determined by the NMR/MS Translator. The list is used to reconstruct the MS<sup>1</sup> spectrum from the 2D <sup>13</sup>C-<sup>1</sup>H HSQC in Figure 3. ACN and FA stand for acetonitrile and formic acid, respectively.

| Metabolite                                                         | Feature                              | $m/z^a$  | ppm <sup>b</sup> |
|--------------------------------------------------------------------|--------------------------------------|----------|------------------|
| Acetic acid                                                        | [M+CH <sub>3</sub> COO] <sup>-</sup> | 119.0354 | 8.27             |
| Acetylcarnitine                                                    | [M+H] <sup>+</sup>                   | 204.1230 | -2.84            |
| Acetylcarnitine                                                    | [M+2Na-H] <sup>+</sup>               | 248.0933 | 23.58            |
| Acetylcarnitine                                                    | [M-H <sub>2</sub> O-H] <sup>-</sup>  | 184.0979 | 2.80             |
| Alanine                                                            | [M+ACN+Na] <sup>+</sup>              | 153.0657 | 11.15            |
| 1,6-Anhydro_beta_glucose/<br>3 Hydroxy 3 methylglutaric acid       | [M+Na] <sup>+</sup>                  | 185.0398 | -15.05           |
| 1,6-Anhydro_beta_glucose/<br>3 Hydroxy 3 methylglutaric acid       | [M+H-H <sub>2</sub> O] <sup>+</sup>  | 145.0467 | -23.62           |
| 1,6-Anhydro_beta_glucose/<br>3 Hydroxy 3 methylglutaric acid       | [M+K] <sup>+</sup>                   | 201.0162 | -1.58            |
| 1,6-Anhydro_beta_glucose/<br>3 Hydroxy 3 methylglutaric acid       | [M-H] <sup>-</sup>                   | 161.0463 | 8.27             |
| 1,6-Anhydro_beta_glucose/<br>3 Hydroxy 3 methylglutaric acid       | [M-H <sub>2</sub> O-H] <sup>-</sup>  | 143.0360 | 11.26            |
| 1,6-Anhydro_beta_glucose/<br>3 Hydroxy 3 methylglutaric acid       | [M+Cl] <sup>-</sup>                  | 197.0232 | 7.49             |
| 1,6-Anhydro_beta_glucose/<br>3 Hydroxy 3 methylglutaric acid       | [M+CH <sub>3</sub> COO] <sup>-</sup> | 221.0659 | -0.99            |
| Arabitol/Xylitol                                                   | [M-H] <sup>-</sup>                   | 151.0615 | 5.55             |
| Arabitol/Xylitol                                                   | [M-H <sub>2</sub> O-H] <sup>-</sup>  | 133.0509 | 6.50             |
| Arabitol/Xylitol                                                   | [M+Cl] <sup>-</sup>                  | 187.0360 | -6.86            |
| Arabitol/Xylitol                                                   | [M+FA-H] <sup>-</sup>                | 197.0686 | 12.48            |
| Arabitol/Xylitol                                                   | [M+F] <sup>-</sup>                   | 171.0675 | 3.64             |
| N-Acetylneuraminic acid                                            | [M-H] <sup>-</sup>                   | 308.0988 | 1.92             |
| Allantoin                                                          | [M+F] <sup>-</sup>                   | 177.0413 | -6.09            |
| Alpha-ketoglutaric acid                                            | [M-H] <sup>-</sup>                   | 145.0142 | 3.77             |
| Alpha-ketoglutaric acid                                            | [M+FA-H] <sup>-</sup>                | 191.0201 | 4.71             |
| Alpha-ketoglutaric acid                                            | [M+CH <sub>3</sub> COO] <sup>-</sup> | 205.0356 | 3.67             |
| Ascorbate                                                          | [M+H-H <sub>2</sub> O] <sup>+</sup>  | 159.0269 | -15.40           |
| Ascorbate                                                          | [M-H] <sup>-</sup>                   | 175.0250 | 4.20             |
| 4-Acetamidobutyric-acid                                            | [M+H] <sup>+</sup>                   | 146.0813 | -3.02            |
| 4-Acetamidobutyric-acid                                            | [M+Na] <sup>+</sup>                  | 168.0632 | -2.91            |
| 4-Acetamidobutyric-acid                                            | [M+H-2H <sub>2</sub> O] <sup>+</sup> | 110.0600 | -5.45            |
| 4-Acetamidobutyric-acid                                            | [M+K] <sup>+</sup>                   | 184.0368 | -4.14            |
| 4-Acetamidobutyric-acid                                            | [M+2Na-H] <sup>+</sup>               | 190.0485 | 15.46            |
| 4-Acetamidobutyric-acid                                            | [M-H] <sup>-</sup>                   | 144.0645 | -11.15           |
| Allose/Fructose/Galactose/Glucose/scyllo-<br>inositol/myo-inositol | [M+H] <sup>+</sup>                   | 181.0703 | -5.01            |
| Allose/Fructose/Galactose/Glucose/scyllo-<br>inositol/myo-inositol | [M+Na] <sup>+</sup>                  | 203.0510 | -10.51           |
| Allose/Fructose/Galactose/Glucose/scyllo-<br>inositol/myo-inositol | [M+H-2H <sub>2</sub> O] <sup>+</sup> | 145.0467 | -23.62           |
| Allose/Fructose/Galactose/Glucose/scyllo-<br>inositol/myo-inositol | [M+K] <sup>+</sup>                   | 219.0258 | -5.89            |
| Allose/Fructose/Galactose/Glucose/scyllo-<br>inositol/myo-inositol | [M+2Na-H] <sup>+</sup>               | 225.0333 | -7.92            |
| Allose/Fructose/Galactose/Glucose/scyllo-<br>inositol/myo-inositol | [M-H] <sup>-</sup>                   | 179.0553 | -1.50            |
| Allose/Fructose/Galactose/Glucose/scyllo-<br>inositol/myo-inositol | [M-H <sub>2</sub> O-H] <sup>-</sup>  | 161.0463 | 8.27             |
| Allose/Fructose/Galactose/Glucose/scyllo-<br>inositol/myo-inositol | [M+Cl] <sup>-</sup>                  | 215.0333 | 4.85             |

|                                                                |                                      |          |        |
|----------------------------------------------------------------|--------------------------------------|----------|--------|
| Allose/Fructose/Galactose/Glucose/scyllo-inositol/myo-inositol | [M+FA-H] <sup>-</sup>                | 225.0626 | 6.87   |
| Allose/Fructose/Galactose/Glucose/scyllo-inositol/myo-inositol | [M+F] <sup>-</sup>                   | 199.0654 | 18.34  |
| 2-Amino adipic acid                                            | [M+Na-2H] <sup>-</sup>               | 182.0465 | 19.83  |
| Arabinose/Xylose/Ribose                                        | [M+Na] <sup>+</sup>                  | 173.0415 | -6.44  |
| Arabinose/Xylose/Ribose                                        | [M-H] <sup>-</sup>                   | 149.0460 | 6.61   |
| Arabinose/Xylose/Ribose                                        | [M-H <sub>2</sub> O-H] <sup>-</sup>  | 131.0366 | 16.66  |
| Arabinose/Xylose/Ribose                                        | [M+Cl] <sup>-</sup>                  | 185.0221 | 2.49   |
| Arabinose/Xylose/Ribose                                        | [M+FA-H] <sup>-</sup>                | 195.0519 | 7.46   |
| Arabinose/Xylose/Ribose                                        | [M+CH <sub>3</sub> COO] <sup>-</sup> | 209.0634 | -13.25 |
| Arabinose/Xylose/Ribose                                        | [M+F] <sup>-</sup>                   | 169.0516 | 2.28   |
| Arginine                                                       | [M+H] <sup>+</sup>                   | 175.1196 | 0.82   |
| Arginine                                                       | [M+K-2H] <sup>-</sup>                | 211.0636 | 18.37  |
| Asparagine                                                     | [M+ACN+H] <sup>+</sup>               | 174.0904 | 14.74  |
| Asparagine                                                     | [M+Cl] <sup>-</sup>                  | 167.0214 | -5.46  |
| Betaine/Valine                                                 | [M+H] <sup>+</sup>                   | 118.0855 | -10.96 |
| Betaine/Valine                                                 | [M+Cl] <sup>-</sup>                  | 152.0467 | -7.67  |
| Carnitine                                                      | [M+H] <sup>+</sup>                   | 162.1123 | -4.40  |
| Carnitine                                                      | [M+H-H <sub>2</sub> O] <sup>+</sup>  | 144.1013 | -8.23  |
| Creatinine                                                     | [M+H] <sup>+</sup>                   | 114.0661 | -5.62  |
| Creatinine                                                     | [M+Na] <sup>+</sup>                  | 136.0481 | -4.63  |
| Creatinine                                                     | [M+K] <sup>+</sup>                   | 152.0218 | -5.18  |
| Creatinine                                                     | [M+2Na-H] <sup>+</sup>               | 158.0263 | -27.15 |
| Creatinine                                                     | [M+Na-2H] <sup>-</sup>               | 134.0364 | 25.04  |
| Creatinine                                                     | [M+F] <sup>-</sup>                   | 132.0572 | -1.13  |
| Cystine                                                        | [M+F] <sup>-</sup>                   | 259.0258 | 13.81  |
| Citraconic acid                                                | [M-H] <sup>-</sup>                   | 129.0194 | 4.73   |
| Citraconic acid                                                | [M-H <sub>2</sub> O-H] <sup>-</sup>  | 111.0089 | 5.92   |
| Citraconic acid                                                | [M+FA-H] <sup>-</sup>                | 175.0250 | 4.20   |
| Citraconic acid                                                | [M+CH <sub>3</sub> COO] <sup>-</sup> | 189.0401 | 0.89   |
| meso_Erythritol/ Threitol                                      | [M+Na] <sup>+</sup>                  | 145.0467 | -7.04  |
| meso_Erythritol/ Threitol                                      | [M+K] <sup>+</sup>                   | 161.0214 | -1.53  |
| meso_Erythritol/ Threitol                                      | [M-H] <sup>-</sup>                   | 121.0523 | 18.20  |
| meso_Erythritol/ Threitol                                      | [M+Na-2H] <sup>-</sup>               | 143.0360 | 28.08  |
| Fucose                                                         | [M+Na] <sup>+</sup>                  | 187.0571 | -6.07  |
| Fucose                                                         | [M+K] <sup>+</sup>                   | 203.0311 | -5.10  |
| Fucose                                                         | [M-H] <sup>-</sup>                   | 163.0622 | 9.21   |
| Fucose                                                         | [M-H <sub>2</sub> O-H] <sup>-</sup>  | 145.0533 | 22.19  |
| Fucose                                                         | [M+Cl] <sup>-</sup>                  | 199.0379 | 2.91   |
| Fucose                                                         | [M+K-2H] <sup>-</sup>                | 201.0210 | 22.07  |
| Fucose                                                         | [M+FA-H] <sup>-</sup>                | 209.0634 | -13.25 |
| Glucuronate                                                    | [M+H-2H <sub>2</sub> O] <sup>+</sup> | 159.0269 | -15.40 |
| Glucuronate                                                    | [M-H] <sup>-</sup>                   | 193.0341 | -3.76  |
| Glucuronate                                                    | [M-H <sub>2</sub> O-H] <sup>-</sup>  | 175.0250 | 4.20   |
| Glucuronate                                                    | [M+K-2H] <sup>-</sup>                | 230.9974 | 28.87  |
| Glutamine                                                      | [M+Na] <sup>+</sup>                  | 169.0600 | 6.43   |
| Glutamine                                                      | [M+H-H <sub>2</sub> O] <sup>+</sup>  | 129.0653 | -8.50  |
| Glutamine                                                      | [M+ACN+H] <sup>+</sup>               | 188.1037 | 1.07   |
| Glutamine                                                      | [M+Cl] <sup>-</sup>                  | 181.0378 | -0.98  |
| Guanidineacetic acid                                           | [M+H] <sup>+</sup>                   | 118.0609 | -6.57  |
| Guanidineacetic acid                                           | [M+ACN+Na] <sup>+</sup>              | 181.0703 | 0.90   |
| Guanidineacetic acid                                           | [M+F] <sup>-</sup>                   | 136.0522 | -0.54  |
| Glycerol                                                       | [M+CH <sub>3</sub> COO] <sup>-</sup> | 151.0615 | 5.55   |
| Gluconic acid                                                  | [M-H] <sup>-</sup>                   | 195.0519 | 7.46   |
| Gluconic acid                                                  | [M-H <sub>2</sub> O-H] <sup>-</sup>  | 177.0413 | 7.91   |
| Gluconic acid                                                  | [M+Na-2H] <sup>-</sup>               | 217.0270 | -24.79 |
| Gluconic acid                                                  | [M+Cl] <sup>-</sup>                  | 231.0287 | 6.49   |
| Gluconic acid                                                  | [M+K-2H] <sup>-</sup>                | 233.0119 | 23.61  |

|                                                           |                                      |          |        |
|-----------------------------------------------------------|--------------------------------------|----------|--------|
| Homocitrulline                                            | [M+Na] <sup>+</sup>                  | 212.1015 | 1.88   |
| Hippuric acid                                             | [M+H] <sup>+</sup>                   | 180.0653 | -4.17  |
| Hippuric acid                                             | [M+Na] <sup>+</sup>                  | 202.0473 | -3.74  |
| Hippuric acid                                             | [M+K] <sup>+</sup>                   | 218.0206 | -6.07  |
| Hippuric acid                                             | [M+2Na-H] <sup>+</sup>               | 224.0292 | -3.60  |
| Hippuric acid                                             | [M-H] <sup>-</sup>                   | 178.0515 | 6.17   |
| Hippuric acid                                             | [M+Cl] <sup>-</sup>                  | 214.0280 | 4.11   |
| Hippuric acid                                             | [M+FA-H] <sup>-</sup>                | 224.0596 | 16.31  |
| Hippuric acid                                             | [M+CH <sub>3</sub> COO] <sup>-</sup> | 238.0771 | 23.43  |
| 4_Hydroxy_3_methoxymandelic_acid                          | [M+Na] <sup>+</sup>                  | 221.0407 | -8.47  |
| 4_Hydroxy_3_methoxymandelic_acid                          | [M+ACN+Na] <sup>+</sup>              | 262.0681 | -3.85  |
| 4_Hydroxy_3_methoxymandelic_acid                          | [M+Li] <sup>+</sup>                  | 205.0671 | -8.53  |
| 4_Hydroxy_3_methoxymandelic_acid                          | [M+F] <sup>-</sup>                   | 217.0480 | -14.99 |
| 4_Hydroxyphenylacetic_acid/<br>3_Hydroxyphenylacetic_acid | [M-H] <sup>-</sup>                   | 151.0402 | 4.62   |
| 4_Hydroxyphenylacetic_acid/<br>3_Hydroxyphenylacetic_acid | [M+CH <sub>3</sub> COO] <sup>-</sup> | 211.0636 | 14.03  |
| 4_Hydroxyphenylacetic_acid/<br>3_Hydroxyphenylacetic_acid | [M+F] <sup>-</sup>                   | 171.0406 | -29.88 |
| Homovanillic acid                                         | [M+Na] <sup>+</sup>                  | 205.0487 | 5.04   |
| Homovanillic acid                                         | [M+Cl] <sup>-</sup>                  | 217.0270 | 1.30   |
| Isethionic acid                                           | [M-H] <sup>-</sup>                   | 124.9914 | 4.43   |
| Lactic acid                                               | [M+Na-2H] <sup>-</sup>               | 111.0089 | 27.59  |
| Lactic acid                                               | [M+FA-H] <sup>-</sup>                | 135.0303 | 7.34   |
| Lactic acid                                               | [M+CH <sub>3</sub> COO] <sup>-</sup> | 149.0460 | 6.61   |
| Lysine                                                    | [M+K-2H] <sup>-</sup>                | 183.0507 | -15.52 |
| Pimelic acid                                              | [M+2Na-H] <sup>+</sup>               | 205.0487 | 16.77  |
| Pimelic acid                                              | [M-H] <sup>-</sup>                   | 159.0676 | 11.50  |
| Pimelic acid                                              | [M+K-2H] <sup>-</sup>                | 197.0232 | 7.79   |
| Pimelic acid                                              | [M+FA-H] <sup>-</sup>                | 205.0724 | 5.95   |
| 1,2_Propanediol                                           | [M+ACN+H] <sup>+</sup>               | 118.0855 | -10.96 |
| 1,2_Propanediol                                           | [M+FA-H] <sup>-</sup>                | 121.0523 | 18.20  |
| 1,2_Propanediol                                           | [M+CH <sub>3</sub> COO] <sup>-</sup> | 135.0649 | -6.53  |
| Quinolinic acid                                           | [M-H] <sup>-</sup>                   | 166.0156 | 9.58   |
| Quinic acid                                               | [M-H] <sup>-</sup>                   | 191.0566 | 5.51   |
| Quinic acid                                               | [M-H <sub>2</sub> O-H] <sup>-</sup>  | 173.0492 | 24.30  |
| Quinic acid                                               | [M+Cl] <sup>-</sup>                  | 227.0340 | 7.64   |
| Quinic acid                                               | [M+F] <sup>-</sup>                   | 211.0636 | 8.62   |
| Saccharate                                                | [M-H <sub>2</sub> O-H] <sup>-</sup>  | 191.0201 | 4.71   |
| Saccharate                                                | [M+Cl] <sup>-</sup>                  | 245.0126 | 25.26  |
| Saccharate                                                | [M+K-2H] <sup>-</sup>                | 246.9927 | 28.73  |
| Serine                                                    | [M+ACN+Na] <sup>+</sup>              | 169.0600 | 6.43   |
| Suberic acid                                              | [M-H] <sup>-</sup>                   | 173.0823 | 5.26   |
| Suberic acid                                              | [M+Cl] <sup>-</sup>                  | 209.0634 | 25.34  |
| Succinic acid                                             | [M+CH <sub>3</sub> COO] <sup>-</sup> | 177.0413 | 7.91   |
| Trigonelline                                              | [M+H] <sup>+</sup>                   | 138.0546 | -6.56  |
| Trigonelline                                              | [M+Na] <sup>+</sup>                  | 160.0364 | -6.65  |
| Trigonelline                                              | [M+K] <sup>+</sup>                   | 176.0110 | -1.96  |
| Trigonelline                                              | [M+FA-H] <sup>-</sup>                | 182.0465 | 6.62   |
| Trigonelline                                              | [M+CH <sub>3</sub> COO] <sup>-</sup> | 196.0599 | -5.63  |
| Tyrosine                                                  | [M+H] <sup>+</sup>                   | 182.0800 | -9.66  |
| Tartaric acid                                             | [M-H] <sup>-</sup>                   | 149.0097 | 7.25   |
| Taurine                                                   | [M+NH <sub>4</sub> ] <sup>+</sup>    | 143.0531 | 28.26  |
| Taurine                                                   | [M-H] <sup>-</sup>                   | 124.0079 | 8.84   |
| Threonine                                                 | [M+K] <sup>+</sup>                   | 158.0263 | 27.74  |
| Uracil                                                    | [M+CH <sub>3</sub> COO] <sup>-</sup> | 171.0406 | 0.32   |
| Caffeine                                                  | [M-H <sub>2</sub> O-H] <sup>-</sup>  | 175.0621 | 0.87   |
| Caffeine                                                  | [M+K-2H] <sup>-</sup>                | 231.0287 | 0.97   |
| Caffeine                                                  | [M+F] <sup>-</sup>                   | 213.0785 | -1.08  |



|                                                           |                                       |          |        |
|-----------------------------------------------------------|---------------------------------------|----------|--------|
| Sucrose/Lactose                                           | [M+Na] <sup>+</sup>                   | 365.1044 | -4.47  |
| Sucrose/Lactose                                           | [M+K] <sup>+</sup>                    | 381.0792 | -1.99  |
| Sucrose/Lactose                                           | [M+Na-2H] <sup>-</sup>                | 363.0805 | -27.09 |
| Sucrose/Lactose                                           | [M+Cl] <sup>-</sup>                   | 377.0852 | 0.38   |
| Sucrose/Lactose                                           | [M-2H] <sup>2-</sup>                  | 170.0480 | -13.16 |
| Galactitol/ Mannitol/Sorbitol                             | [M+Na] <sup>+</sup>                   | 205.0671 | -8.43  |
| Galactitol/ Mannitol/Sorbitol                             | [M+K] <sup>+</sup>                    | 221.0407 | -9.16  |
| Galactitol/ Mannitol/Sorbitol                             | [M-H <sub>2</sub> O-H] <sup>-</sup>   | 163.0622 | 9.21   |
| Galactitol/ Mannitol/Sorbitol                             | [M+Cl] <sup>-</sup>                   | 217.0480 | 0.37   |
| Galactitol/ Mannitol/Sorbitol                             | [M+F] <sup>-</sup>                    | 201.0763 | -5.79  |
| 3_Hydroxyisobutyric_acid/<br>Alpha hydroxyisobutyric acid | [M+ACN+H] <sup>+</sup>                | 146.0813 | -3.02  |
| 3_Hydroxyisobutyric_acid/<br>Alpha hydroxyisobutyric acid | [M+ACN+Na] <sup>+</sup>               | 168.0632 | -2.91  |
| 3_Hydroxyisobutyric_acid/<br>Alpha hydroxyisobutyric acid | [M+FA-H] <sup>-</sup>                 | 149.0460 | 6.61   |
| 3_Hydroxyisobutyric_acid<br>Alpha hydroxyisobutyric acid  | [M+CH <sub>3</sub> COO] <sup>-</sup>  | 163.0622 | 9.21   |
| Indoxyl Sulfate                                           | [M-H] <sup>-</sup>                    | 212.0027 | 4.60   |
| 3 Hydroxyisovaleric acid                                  | [M+ACN+Na] <sup>+</sup>               | 182.0800 | 3.55   |
| 3 Hydroxyisovaleric acid                                  | [M+FA-H] <sup>-</sup>                 | 163.0622 | 9.21   |
| 3 Hydroxyisovaleric acid                                  | [M+CH <sub>3</sub> COO] <sup>-</sup>  | 177.0793 | 16.81  |
| 1,3 Dimethyluric acid                                     | [M-H] <sup>-</sup>                    | 195.0519 | 0.61   |
| 1,3 Dimethyluric acid                                     | [M-H <sub>2</sub> O-H] <sup>-</sup>   | 177.0413 | 0.37   |
| 1,3 Dimethyluric acid                                     | [M+Cl] <sup>-</sup>                   | 231.0287 | 0.71   |
| 1,3 Dimethyluric acid                                     | [M+K-2H] <sup>-</sup>                 | 233.0119 | 17.87  |
| Dimethyl sulfone                                          | [M+ACN+Na] <sup>+</sup>               | 158.0263 | 7.37   |
| Dimethyl sulfone                                          | [M+CH <sub>3</sub> COO] <sup>-</sup>  | 153.0214 | -5.01  |
| Indole 3 acetic acid                                      | [M+H] <sup>+</sup>                    | 176.0684 | -15.81 |
| Indole 3 acetic acid                                      | [M+Li] <sup>+</sup>                   | 182.0800 | 3.44   |
| Leucine                                                   | [M+2Na-H] <sup>+</sup>                | 176.0684 | 11.51  |
| N acetyl L aspartic acid                                  | [M+K] <sup>+</sup>                    | 214.0092 | -11.87 |
| N acetyl L aspartic acid                                  | [M-H] <sup>-</sup>                    | 174.0422 | 11.17  |
| N acetyl L aspartic acid                                  | [M+F] <sup>-</sup>                    | 194.0454 | -5.32  |
| Adenosine                                                 | [M+ACN+H] <sup>+</sup>                | 309.1226 | -27.54 |
| Inosine                                                   | [M+K-2H] <sup>-</sup>                 | 305.0348 | 19.49  |
| 1 Methyl L Histidine                                      | [M+H] <sup>+</sup>                    | 170.0922 | -4.51  |
| 1 Methyl L Histidine                                      | [M+Na] <sup>+</sup>                   | 192.0730 | -9.95  |
| 1 Methyl L Histidine                                      | [M+K] <sup>+</sup>                    | 208.0479 | -4.26  |
| 1 Methyl L Histidine                                      | [M+Li] <sup>+</sup>                   | 176.1035 | 13.34  |
| 1 Methyl L Histidine                                      | [M+CH <sub>3</sub> OH+H] <sup>+</sup> | 202.1180 | -5.96  |
| Glycolate                                                 | [M+CH <sub>3</sub> COO] <sup>-</sup>  | 135.0303 | 7.34   |
| Citrate/ Threo isocitric acid                             | [M+Na] <sup>+</sup>                   | 215.0156 | -5.43  |
| Citrate/ Threo isocitric acid                             | [M+2Na-H] <sup>+</sup>                | 236.9980 | -2.96  |
| Citrate/ Threo isocitric acid                             | [M-H] <sup>-</sup>                    | 191.0201 | 4.71   |
| Citrate/ Threo isocitric acid                             | [M-H <sub>2</sub> O-H] <sup>-</sup>   | 173.0094 | 4.28   |
| Citrate/ Threo isocitric acid                             | [M+Na-2H] <sup>-</sup>                | 213.0057 | 21.41  |
| Citrate/ Threo isocitric acid                             | [M+Cl] <sup>-</sup>                   | 226.9963 | 1.88   |
| Creatine                                                  | [M+H] <sup>+</sup>                    | 132.0758 | -11.36 |
| Creatine                                                  | [M+H-H <sub>2</sub> O] <sup>+</sup>   | 114.0661 | -5.62  |
| Creatine                                                  | [M+Na-2H] <sup>-</sup>                | 152.0467 | 20.18  |
| Histidine                                                 | [M+H] <sup>+</sup>                    | 156.0768 | -3.37  |
| Histidine                                                 | [M+Na] <sup>+</sup>                   | 178.0575 | -9.65  |
| Histidine                                                 | [M+K] <sup>+</sup>                    | 194.0325 | -3.40  |
| Histidine                                                 | [M+CH <sub>3</sub> OH+H] <sup>+</sup> | 188.1037 | 1.07   |
| Histidine                                                 | [M-H] <sup>-</sup>                    | 154.0627 | 6.53   |
| Histidine                                                 | [M-H <sub>2</sub> O-H] <sup>-</sup>   | 136.0522 | 7.86   |
| Histidine                                                 | [M+Na-2H] <sup>-</sup>                | 176.0471 | 19.67  |
| Histidine                                                 | [M+Cl] <sup>-</sup>                   | 190.0385 | 0.79   |
| Pantothenate                                              | [M-H] <sup>-</sup>                    | 218.1037 | 4.02   |

|                          |                 |          |        |
|--------------------------|-----------------|----------|--------|
| Pantothenate             | $[M+K-2H]^-$    | 256.0593 | 2.34   |
| Pantothenate             | $[M+FA-H]^-$    | 264.1076 | -2.70  |
| Trans-/Cis-aconitic_acid | $[M+K]^+$       | 212.9783 | -8.47  |
| Trans-/Cis-aconitic_acid | $[M-H]^-$       | 173.0094 | 4.28   |
| Adipic acid              | $[M+2Na-H]^+$   | 191.0263 | -17.28 |
| Adipic acid              | $[M-H]^-$       | 145.0533 | 22.19  |
| Adipic acid              | $[M+FA-H]^-$    | 191.0566 | 5.51   |
| Adipic acid              | $[M+CH_3COO]^-$ | 205.0724 | 5.95   |

<sup>a</sup> Experimentally detected  $m/z$  ratio of an ion.

<sup>b</sup>  $m/z$  ratio difference (in units of ppm) between experimentally detected  $m/z$  ratio and theoretical  $m/z$  ratio of a given ion.
